# Supplementary material
Source: PubMed Central journal article supplement (PMC4636908)
Supplement: NIHMS734741-supplement-Supplemental_data.pdf [file NIHMS734741-supplement-Supplemental_data.pdf]

**Table S1. Gene names and fold change after IRI in WT mice**

**(a) Inflammatory Response**

| Gene    | Fold Change | p-Value | Gene Name                                                                             |
|---------|-------------|---------|---------------------------------------------------------------------------------------|
| Arb2    | 1.45        | 0.0112  | arrestin, beta 2                                                                      |
| Axl     | 1.45        | 0.0010  | AXL receptor tyrosine kinase                                                          |
| Bcl3    | 1.59        | 0.0062  | B cell leukemia/lymphoma 3                                                            |
| Birc3   | 1.48        | 0.0028  | baculoviral IAP repeat-containing 3                                                   |
| C3      | 2.79        | 0.0085  | complement component 3                                                                |
| Ccl2    | 3.61        | 0.0044  | chemokine (C-C motif) ligand 2                                                        |
| Ccl22   | 1.60        | 0.0202  | chemokine (C-C motif) ligand 22                                                       |
| Ccl3    | 1.99        | 0.0031  | chemokine (C-C motif) ligand 3                                                        |
| Ccl5    | 2.43        | 0.0033  | chemokine (C-C motif) ligand 5                                                        |
| Ccl7    | 1.93        | 0.0064  | chemokine (C-C motif) ligand 7                                                        |
| Ccr1    | 1.34        | 0.0418  | chemokine (C-C motif) receptor 1                                                      |
| Ccr2    | 2.50        | 0.0023  | chemokine (C-C motif) receptor 2                                                      |
| Ccr5    | 1.93        | 0.0057  | chemokine (C-C motif) receptor 5                                                      |
| Cd180   | 1.81        | 0.0037  | CD180 antigen                                                                         |
| Clec7a  | 2.59        | 0.0041  | C-type lectin domain family 7, member a                                               |
| Cfh     | 1.55        | 0.0136  | complement component factor h                                                         |
| Cxcl1   | 1.61        | 0.0298  | chemokine (C-X-C motif) ligand 1                                                      |
| Cxcl10  | 1.73        | 0.0027  | chemokine (C-X-C motif) ligand 10                                                     |
| Cxcl11  | 1.36        | 0.0007  | chemokine (C-X-C motif) ligand 11                                                     |
| Cxcl2   | 1.48        | 0.0183  | chemokine (C-X-C motif) ligand 2                                                      |
| Cxcl3   | 1.50        | 0.0137  | chemokine (C-X-C motif) ligand 3                                                      |
| Cxcr6   | 1.78        | 0.0002  | chemokine (C-X-C motif) receptor 6                                                    |
| Ecm1    | -1.57       | 0.0028  | extracellular matrix protein 1                                                        |
| Elf3    | 1.46        | 0.0050  | E74-like factor 3                                                                     |
| F2rl1   | 1.43        | 0.0121  | coagulation factor II (thrombin) receptor-like 1                                      |
| Il1b    | 1.42        | 0.0058  | interleukin 1 beta                                                                    |
| Il1f6   | 2.15        | 0.0023  | interleukin 1 family, member 6                                                        |
| Il34    | 2.23        | 0.0007  | interleukin 34                                                                        |
| Irf1    | 1.37        | 0.0010  | interferon regulatory factor 1                                                        |
| Itgb6   | -1.65       | 0.0000  | integrin beta 6                                                                       |
| Lck     | 1.29        | 0.0061  | lymphocyte protein tyrosine kinase                                                    |
| Lxn     | 1.44        | 0.0003  | latexin                                                                               |
| Ly86    | 2.07        | 0.0060  | lymphocyte antigen 86                                                                 |
| Lyn     | 1.34        | 0.0023  | Yamaguchi sarcoma viral (v-yes-1) oncogene homolog                                    |
| Map3k1  | 1.50        | 0.0008  | mitogen-activated protein kinase kinase kinase 1                                      |
| Map3k14 | 1.31        | 0.0002  | mitogen-activated protein kinase kinase kinase 14                                     |
| Nfkb2   | 1.43        | 0.0037  | nuclear factor of kappa light polypeptide gene enhancer in B cells 2, p49/p100        |
| Nfkbie  | 1.46        | 0.0011  | nuclear factor of kappa light polypeptide gene enhancer in B cells inhibitor, epsilon |
| Nfkbiz  | 1.39        | 0.0248  | nuclear factor of kappa light polypeptide gene enhancer in B cells inhibitor, zeta    |
| P2rx7   | 1.34        | 0.0104  | purinergic receptor P2X, ligand-gated ion channel, 7                                  |
| Pik3cg  | 1.56        | 0.0104  | phosphoinositide-3-kinase, catalytic, gamma polypeptide                               |
| Ptafr   | 1.58        | 0.0008  | platelet-activating factor receptor                                                   |
| Rps6ka4 | 1.42        | 0.0100  | ribosomal protein S6 kinase, polypeptide 4                                            |
| Sdc1    | 1.39        | 0.0202  | syndecan 1                                                                            |
| Slc11a1 | 1.48        | 0.0007  | solute carrier family 11 (proton-coupled divalent metal ion transporters), member 1   |
| Syk     | 1.31        | 0.0315  | spleen tyrosine kinase                                                                |
| Ticam2  | 1.35        | 0.0025  | toll-like receptor adaptor molecule 2                                                 |
| Tlr1    | 1.84        | 0.0001  | toll-like receptor 1                                                                  |
| Tlr11   | 1.31        | 0.0342  | toll-like receptor 11                                                                 |
| Tlr13   | 1.94        | 0.0069  | toll-like receptor 13                                                                 |
| Tlr2    | 1.34        | 0.0495  | toll-like receptor 2                                                                  |
| Tlr7    | 1.50        | 0.0076  | toll-like receptor 7                                                                  |
| Tlr8    | 2.32        | 0.0052  | toll-like receptor 8                                                                  |
| Tlr9    | 1.51        | 0.0003  | toll-like receptor 9                                                                  |
| Tnf     | 1.31        | 0.0194  | tumor necrosis factor                                                                 |
| Traf1   | 1.40        | 0.0022  | TNF receptor-associated factor 1                                                      |

## (b) Hypoxia

| Gene     | Fold Change | p-Value | Gene Name                                                                          |
|----------|-------------|---------|------------------------------------------------------------------------------------|
| Aldoa    | 1.30        | 0.0352  | aldolase A, fructose-bisphosphate                                                  |
| Anxa1    | 1.61        | 0.0086  | annexin A1                                                                         |
| Bhlhe40  | 1.49        | 0.0068  | basic helix-loop-helix family, member e40                                          |
| Bhlhe41  | 1.73        | 0.0097  | basic helix-loop-helix family, member e41                                          |
| Birc2    | 1.48        | 0.0038  | baculoviral IAP repeat-containing 2                                                |
| Cd14     | 2.00        | 0.0101  | Cluster of differntitaion 14                                                       |
| Cd24a    | 1.49        | 0.0103  | CD24a antigen                                                                      |
| Cp       | 2.06        | 0.0030  | ceruloplasmin                                                                      |
| Cpeb4    | -1.35       | 0.0009  | cytoplasmic polyadenylation element binding protein 4                              |
| Csf1     | 1.34        | 0.0167  | colony stimulating factor 1 (macrophage)                                           |
| Dpp4     | -1.30       | 0.0020  | dipeptidylpeptidase 4                                                              |
| Edn1     | 2.21        | 0.0028  | endothelin 1                                                                       |
| Fgg      | 1.70        | 0.0104  | fibrinogen gamma chain                                                             |
| Havcr1   | 7.11        | 0.0021  | hepatitis A virus cellular receptor 1                                              |
| Hmox1    | 1.45        | 0.0116  | heme oxygenase (decycling) 1                                                       |
| Itgb2    | 1.63        | 0.0028  | integrin beta 2                                                                    |
| Itpr2    | -1.32       | 0.0003  | inositol 1,4,5-triphosphate receptor 2                                             |
| Kcnma1   | -1.34       | 0.0432  | potassium large conductance calcium-activated channel, subfamily M, alpha member 1 |
| Lcn2     | 4.62        | 0.0031  | lipocalin 2                                                                        |
| Mmp14    | 1.85        | 0.0012  | matrix metallopeptidase 14 (membrane-inserted)                                     |
| Mmp2     | 1.72        | 0.0126  | matrix metallopeptidase 2                                                          |
| Muc1     | 2.01        | 0.0008  | mucin 1, transmembrane                                                             |
| Myc      | 1.66        | 0.0034  | myelocytomatosis oncogene                                                          |
| Ndrp1    | -1.44       | 0.0015  | N-myc downstream regulated gene 1                                                  |
| Nt5e     | -1.36       | 0.0127  | 5' nucleotidase, ecto                                                              |
| Pld2     | 1.35        | 0.0015  | phospholipase D2                                                                   |
| Pygm     | -1.33       | 0.0412  | muscle glycogen phosphorylase                                                      |
| Serpine1 | 1.87        | 0.0024  | serine (or cysteine) peptidase inhibitor, clade E, member 1                        |
| Vcam1    | 3.80        | 0.0011  | vascular cell adhesion molecule 1                                                  |

## (c) Oxidative Stress

| Gene     | Fold Change | p-Value | Gene Name                                                                      |
|----------|-------------|---------|--------------------------------------------------------------------------------|
| Akr1c18  | -3.04       | 0.0011  | aldo-keto reductase family 1, member C18                                       |
| Aldh1a1  | 2.07        | 0.0005  | aldehyde dehydrogenase family 1, subfamily A1                                  |
| Apoa4    | -1.35       | 0.0090  | apolipoprotein A-IV                                                            |
| ApoE     | 1.36        | 0.0175  | apolipoprotein E                                                               |
| Arntl    | -3.17       | 0.0004  | aryl hydrocarbon receptor nuclear translocator-like                            |
| Car3     | -2.91       | 0.0020  | carbonic anhydrase 3                                                           |
| Cygb     | 2.07        | 0.0007  | cytoglobin                                                                     |
| Hgf      | 1.40        | 0.0366  | hepatocyte growth factor                                                       |
| Hspb1    | 1.79        | 0.0047  | heat shock protein beta 1 (HSP27)                                              |
| Ncf2     | 1.34        | 0.0161  | neutrophil cytosolic factor 2                                                  |
| Nqo1     | 1.58        | 0.0010  | NAD(P)H dehydrogenase, quinone 1                                               |
| Plk3     | -1.71       | 0.0250  | polo-like kinase 3                                                             |
| Prnp     | 1.41        | 0.0002  | prion protein                                                                  |
| Rbm11    | 1.69        | 0.0111  | RNA binding motif protein 11                                                   |
| Slc25a24 | 1.76        | 0.0101  | solute carrier family 25 (mitochondrial carrier, phosphate carrier), member 24 |
| Txnip    | 2.20        | 0.0176  | thioredoxin interacting protein                                                |

(d) Fibrosis

| Gene   | Fold Change | p-Value | Gene Name                                                          |
|--------|-------------|---------|--------------------------------------------------------------------|
| Cd44   | 2.40        | 0.0010  | CD44 antigen                                                       |
| Col1a1 | 1.40        | 0.0105  | collagen, type I, alpha 1                                          |
| Col1a2 | 1.29        | 0.0277  | collagen, type I, alpha 2                                          |
| Col4a3 | -1.43       | 0.0001  | collagen, type IV, alpha 3                                         |
| Col6a6 | -1.55       | 0.0003  | collagen, type VI, alpha 6                                         |
| Fn1    | 1.81        | 0.0020  | fibronectin 1                                                      |
| Itga4  | 1.37        | 0.0127  | integrin alpha 4                                                   |
| Lamc2  | 1.36        | 0.0153  | laminin, gamma 2                                                   |
| Mt1    | 1.35        | 0.0046  | metallothionein 1                                                  |
| Mt2    | 1.35        | 0.0099  | metallothionein 2                                                  |
| Mtss1  | 1.34        | 0.0027  | metastasis suppressor 1                                            |
| Nphs2  | -1.45       | 0.0004  | nephrosis 2, podocin                                               |
| Pdgfra | 1.41        | 0.0099  | platelet derived growth factor receptor, alpha polypeptide         |
| Ren1   | -1.37       | 0.0370  | renin 1 structural                                                 |
| Runx1  | 2.22        | 0.0004  | runt related transcription factor 1                                |
| Spp1   | 1.57        | 0.0053  | sphingosine-1-phosphate phosphatase 1                              |
| Tgfb1  | 1.33        | 0.0005  | transforming growth factor, beta 1                                 |
| Thbs1  | 1.41        | 0.0133  | thrombospondin 1                                                   |
| Thbs2  | 1.92        | 0.0016  | thrombospondin 2                                                   |
| Tnc    | 1.99        | 0.0093  | tenascin C                                                         |
| Tnn    | -1.33       | 0.0130  | tenascin N                                                         |
| Tnr    | -1.41       | 0.0401  | tenascin R                                                         |
| Trpv5  | 1.54        | 0.0001  | transient receptor potential cation channel, subfamily V, member 5 |
| Vav3   | 1.31        | 0.0109  | vav 3 oncogene                                                     |
